# Supplementary material for: Process Optimization of Phytoantioxidant and Photoprotective Compounds from Carob Pods (Ceratonia siliqua L.) Using Ultrasonic Assisted Extraction Method
Source: MDPI journal article supplement (doi:10.3390/molecules27248802), 2022-12-12
Supplement: s1 [file s1]

## Supplementary Materials

Article

# Process optimization of phytoantioxidant and photoprotective compounds from Carob pods (*Ceratonia siliqua* L.) using ultrasonic assisted extraction method

Radia Ayad <sup>1,2</sup>, Rima Ayad <sup>3</sup>, Hayat Bourekoua<sup>4</sup>, Mostefa Lefahal<sup>1</sup>, El Hani Makhloufi<sup>1</sup>, Salah Akkal<sup>1</sup>, Kamel Medjroubi <sup>1</sup> and Gema Nieto<sup>5,\*</sup>

<sup>1</sup> Valorization of Natural Resources, Bioactive Molecules and Biological Analysis Unit, Department of Chemistry, Frères Mentouri Constantine 1 University, 25000 Constantine, Algeria; radia.ayad@univ-jijel.dz (R.A.); mlefahal@gmail.com (M.L.); makhloufi\_el\_hani@yahoo.fr (E.H.M.); salah4dz@yahoo.fr (S.A.); medjroubi@yahoo.fr (K.M.)

<sup>2</sup> Laboratory of Phytochemistry and Pharmacology, Department of Chemistry, Faculty of Exact Sciences and Informatics, University Mohammed Seddik Benyahia of Jijel, 18000 Jijel, Algeria

<sup>3</sup> Laboratory of Biotechnology, Environment and Health, Department of Applied Microbiology and Food Science, Faculty of Nature and Life Sciences, University Mohammed Seddik Benyahia of Jijel, 18000 Jijel, Algeria; rima.ayad@univ-jijel.dz

<sup>4</sup> Laboratoire de Nutrition et Technologie Alimentaire (LNTA), Institut de la Nutrition, de l'Alimentation et des Technologies Agro-Alimentaires (INATAA), Frères Mentouri-Constantine 1 University, 25000 Constantine, Algeria; bourekoua.h@hotmail.fr

<sup>5</sup> Department of Food Technology, Food Science and Nutrition, Faculty of Veterinary Sciences, Regional Campus of International Excellence "Campus Mare Nostrum", University of Murcia, 30071 Murcia, Spain

\* Correspondence: gnieto@um.es; Tel.: +34-868-889-624

## Contents

**I. Supplementary Table S1.** Optimization of the parameters by desirability function (optimisation des paramètres)

**II. Supplementary Table S2.** Solution of desirability function

**III. Supplementary Table S3.** Optimal conditions and predicted responses by desirability function (Multiple response predictions)

**IV. Supplementary Table S4.** Relationship between the erythemogenic effect, and the intensity of the radiation at each wavelength

**V. Supplementary Figure S1.** Determination of optimal conditions and predicted responses (TPC, TAC, DPPH, and SPF) by desirability function

**I. Supplementary Table S1.** Optimization of the parameters by desirability function (optimisation des paramètres)

| Response | Objective | Lower | Target | higher | Weight | Importance |
|----------|-----------|-------|--------|--------|--------|------------|
| SPF      | Maximum   | 8.62  | 22.37  |        | 1      | 1          |
| DPPH     | Maximum   | 56.35 | 90.50  |        | 1      | 1          |
| TAC      | Maximum   | 22.00 | 49.30  |        | 1      | 1          |
| TPC      | Maximum   | 6.21  | 21.92  |        | 1      | 1          |

**II. Supplementary Table S2.** Solution of desirability function

| Solution | X1      | X2      | X3   | SPF<br>Adjusted<br>value | DPPH<br>Adjusted<br>value | TAC<br>Adjusted<br>value | TPC<br>Adjusted<br>value | Desirability<br>composite |
|----------|---------|---------|------|--------------------------|---------------------------|--------------------------|--------------------------|---------------------------|
| 1        | 50.5212 | 53.9030 | 39.8 | 22.3477                  | 89.8908                   | 49.1048                  | 23.6322                  | 0.993322                  |

**III. Supplementary Table S3.** Optimal conditions and predicted responses by desirability function (Multiple response predictions)

| Variable | Configuration |  |  |  |
|----------|---------------|--|--|--|
| X1       | 50.5212       |  |  |  |
| X2       | 53.903        |  |  |  |
| X3       | 39.8          |  |  |  |

  

| Response | Adjusted<br>value | ErT ajust | IC at 95 %       | IP at 95 %       |
|----------|-------------------|-----------|------------------|------------------|
| SPF      | 22.348            | 0.601     | (21.008; 23.687) | (20.317; 24.379) |
| DPPH     | 89.89             | 2.19      | (85.00; 94.78)   | (82.48; 97.30)   |
| TAC      | 49.10             | 1.78      | (45.13; 53.08)   | (43.08; 55.13)   |
| TPC      | 23.632            | 0.694     | (22.086; 25.178) | (21.288; 25.976) |

**IV. Supplementary Table S4.** Relationship between the erythemogenic effect, and the intensity of the radiation at each wavelength

| $\lambda$ (nm)                  | 290    | 295    | 300    | 305    | 310    | 315    | 320    | Total  |
|---------------------------------|--------|--------|--------|--------|--------|--------|--------|--------|
| $EE(\lambda) \times I(\lambda)$ | 0.0150 | 0.0817 | 0.2874 | 0.3278 | 0.1864 | 0.0839 | 0.0180 | 1.0000 |

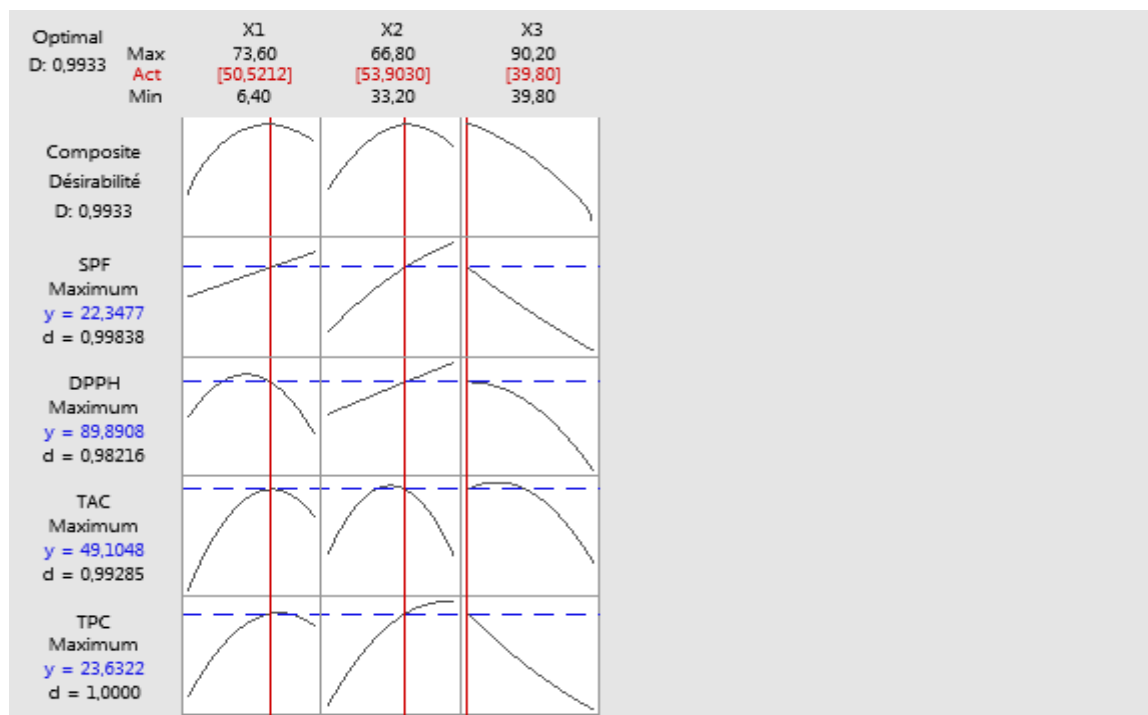

**V. Supplementary Figure S1.** Determination of optimal conditions and predicted responses (TPC, TAC, DPPH, and SPF) by desirability function
